# Supplementary material
Source: Springer Nature journal article supplement (https://cris.unibo.it/retrieve/2f040380-37e0-4ebe-98c5-5928120721bd/41523_2026_920_MOESM1_ESM.docx)
Supplement: MOESM1 [file 41523_2026_920_MOESM1_ESM.docx]

**SUPPLEMENTARY INFORMATION**

[Supplementary Figure 2](#_Toc214788479)

[Supplementary Figure 1: Flow chart summarizing the study cohort (n=291). 2](#_Toc214788480)

[Supplementary Table 3](#_Toc214788482)

[Supplementary Table 1: Percentage of missing data in each variable (n=291)](#_Toc214788483) 3

# Supplementary Figure

## Supplementary Figure 1: Flow chart summarizing the study cohort (n=291)

**
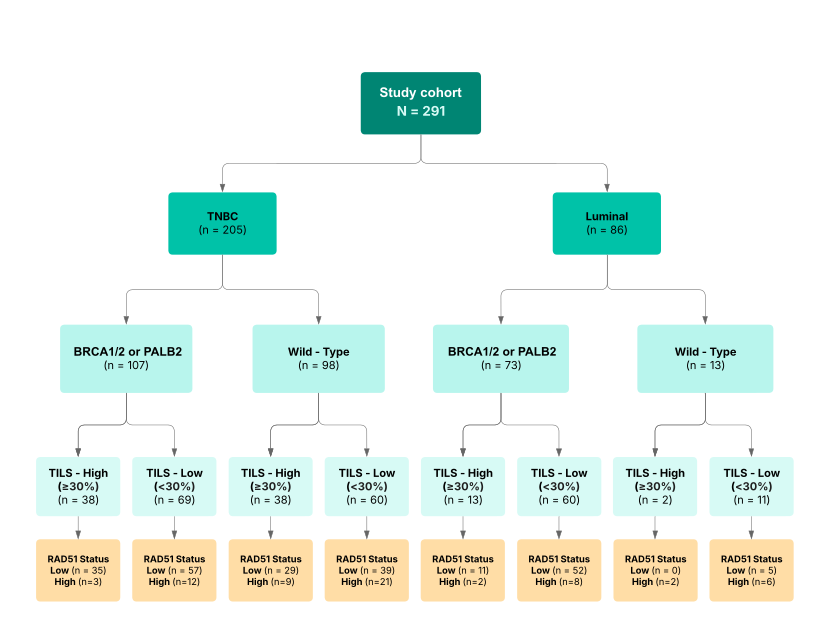
****Supplementary Table**

## Supplementary Table 1: Percentage of missing data in each variable (n=291)

|  | **n** | **%** |
| --- | --- | --- |
| Age | 131 | 45.0 |
| Stage | 51 | 17.5 |
| Histological type | 175 | 60.1 |
| Estrogen receptor status | 18 | 6.2 |
| HER2 status | 0 | 0 |
| Breast cancer subtype | 4 | 1.4 |
| Germline HRR mutations | 0 | 0 |
| RAD51 | 0 | 0 |
| TILs | 23 | 7.9 |
| Neoadjuvant treatment | 0 | 0 |
| Adjuvant treatment | 0 | 0 |
